# Supplementary material
Source: Springer Nature journal article supplement (https://www.springermedizin.de/resource/supplementary/12887_2011_634_MOESM1_ESM.pdf/9475696)
Supplement: MOESM1 [file 9475696]

# HOPSCOTCH Pre-Specialist Summary

## Summary Report for Test Patient

Patient Name: Test Patient (Male,10)

HOPSCOTCH ID: 90000000

|                 |                  |
|-----------------|------------------|
| Date Completed: | 10 November 2011 |
| ATSI Status:    | No               |

|                               |         |
|-------------------------------|---------|
| Completed by:                 | Mother  |
| Main language spoken at home: | English |

### General Health, Mental Health, and Behaviour

|                                |            |
|--------------------------------|------------|
| General Health:                | Very Good  |
| PedsQL Physical Health:        | No Problem |
| PedsQL Psychosocial Health:    | No Problem |
| SDQ Total Problems:            | Normal     |
| SDQ Prosocial Behaviour:       | Normal     |
| SDQ Emotional Problems:        | Borderline |
| SDQ Peer Problems:             | Normal     |
| SDQ Conduct Problems:          | Normal     |
| SDQ Hyperactivity/Inattention: | Normal     |

|                             |     |
|-----------------------------|-----|
| Child at School:            | Yes |
| Grade:                      | 3   |
| Repeated a school grade:    | Yes |
| Child at mainstream school: | No  |
| Require teacher's aide:     | No  |

### Infant Information

|                         |             |
|-------------------------|-------------|
| Birth weight:           | 3200 grams  |
| Birth weight assesment: | Normal BW   |
| Gestation:              | 39 weeks    |
| Gestation assesment:    | Normal Term |
| Discharged at:          | 5 days      |
| Type of birth:          | Caesarean   |
| NICU/SCN:               | No          |
| Ventilated:             |             |

|                                                       |            |
|-------------------------------------------------------|------------|
| Breastfed for:                                        | 9 months   |
| Solids started at:                                    | 6 months   |
| Poor weight gain/feeding problems in first two years: | No         |
| Immunisations up to date:                             | Up to date |

### Concern about child's weight

|         |          |
|---------|----------|
| Parent: | Very     |
| Child:  | A little |

|              |    |
|--------------|----|
| Help Sought: | No |
|--------------|----|

### Health Problems

|                                                  |            |          |                  |
|--------------------------------------------------|------------|----------|------------------|
| PedsQL impact of child's health on whole family: | No Problem |          |                  |
| Asthma needing medication:                       | Yes        |          |                  |
| Mobility and/or joint problems:                  | No         |          |                  |
| Other hospital admissions:                       | Yes        | Details: | Adenoids removal |
| Prescribed regular medications:                  | No         |          |                  |

|                               |    |  |  |
|-------------------------------|----|--|--|
| Allergies:                    | No |  |  |
| Developmental delay:          | No |  |  |
| Operations:                   | No |  |  |
| Other serious illness:        | No |  |  |
| Steroid medication (current): | No |  |  |
| Steroid medication (ever):    | No |  |  |

## Child's Family History

|                                    | Mother's side | Father's side          |
|------------------------------------|---------------|------------------------|
| High blood pressure:               | Mother        | Grandmother            |
| Heart attack:                      |               |                        |
| Diabetes:                          |               |                        |
| Stroke:                            |               |                        |
| Lap band/weight reduction surgery: | Grandfather   |                        |
| Early severe obesity:              |               |                        |
| High cholesterol or triglycerides: |               | Mother;<br>Grandmother |
| Polycystic ovary syndrome:         |               |                        |
| Thyroid problems:                  |               | Grandmother            |

## Parent Health Now

|                                      |            |
|--------------------------------------|------------|
| General Health:                      | Excellent  |
| Life difficulty:                     | Some       |
| Serious psychological distress (K6): | No         |
| Illness/Health conditions:           | No         |
|                                      |            |
| Weight:                              | 72 kg      |
| Height:                              | 164 cm     |
| BMI:                                 | 26         |
| BMI status:                          | Overweight |

## Parent Health In Pregnancy

|                              |          |
|------------------------------|----------|
| Weight gain:                 | 12 kg    |
| Weight gain assessment:      | Adequate |
| Back to pre-pregnant weight: | Yes      |
| Problems during pregnancy:   | None     |
| Pregnancy problem details:   |          |

## Spouse/Partner

|                             |        |
|-----------------------------|--------|
| Live with parent and child: | Yes    |
| Relationships to child:     | Father |
| Weight:                     | 99 kg  |
| BMI:                        | 27     |

|                 |            |
|-----------------|------------|
| Spouse gender:  | Male       |
| General health: | Excellent  |
| Height:         | 189 cm     |
| BMI Status:     | Overweight |

## Child Care

|                                                        |                                 |
|--------------------------------------------------------|---------------------------------|
| Who else play an important role in looking after child | Grandparents: 5 hours per week. |
|--------------------------------------------------------|---------------------------------|

## Child Sleep

|                    |           |
|--------------------|-----------|
| Bedtime (weekday): | 10 pm     |
| Regular Bedtime:   | Sometimes |

|                       |         |
|-----------------------|---------|
| Amount of Sleep/night | 9 hours |
| Sleep assessment:     | Short   |

|                                        |                                                                                               |
|----------------------------------------|-----------------------------------------------------------------------------------------------|
| Sleep problems $\geq 4$ nights a week: | Difficulty getting to sleep at night;<br>Not happy to sleep alone;<br>Waking during the night |
|----------------------------------------|-----------------------------------------------------------------------------------------------|

|                |          |
|----------------|----------|
| Sleep problem: | Moderate |
|----------------|----------|

## Child's Diet

Regular buy

|                                  |     |
|----------------------------------|-----|
| Low fat or reduced fat milk:     | Yes |
| Softdrink/Cordial/Fruit juice:   | Yes |
| Diet Softdrink/Cordial:          | Yes |
| Single-serve package snack food: | Yes |

Days of week (typical week)

|                                    |        |
|------------------------------------|--------|
| Eat breakfast:                     | 7 days |
| Eat dinner at table with parents:  | 7 days |
| Watch TV while eating meals/snack: | 4 days |
| Eat takeaway meals:                | 5 days |

## Child's activity

Days of week during typical week

|                                            |        |
|--------------------------------------------|--------|
| Watch TV/DVD in own room:                  | 0 days |
| Do organised sport or physical activity:   | 2 days |
| Attend creche/kinder/school:               | 5 days |
| Walk to/from creche/kinder/school:         | 5 days |
| Bike/scooter to/from creche/kinder/school: | 0 days |
| Child use public transportation:           | 0 days |

|                                              |      |
|----------------------------------------------|------|
| Distance home to creche/kinder/school:       | 2 km |
| Safe front or backyard where child can play: | Yes  |
| Parent has to be present when child in yard: | No   |
| Child has access to other safe play areas:   | Yes  |

Hours per day child spends

On creche/kinder/school days

On non-creche/kinder/school days

|                               |                 |                |
|-------------------------------|-----------------|----------------|
| Outdoors for transport?       | 0 hours 25 mins | 0 hours 0 mins |
| Outdoors for play/recreation? | 0 hours 30 mins | 3 hours 0 mins |
| Watching TV or DVD?           | 5 hours 30 mins | 6 hours 0 mins |
| On the computer?              | 1 hours 30 mins | 3 hours 0 mins |
| Playing video games?          | 0 hours 0 mins  | 0 hours 0 mins |
